# Supplementary material for: Plasmodium falciparum gametocyte dynamics after pyronaridine–artesunate or artemether–lumefantrine treatment
Source: Springer Nature journal article supplement (doi:10.1186/s12936-018-2373-7), 2018-06-04
Supplement: MOESM1 [file 15817218]

### Additional file 1: Weight-based dosing of treatments

Total duration of treatment for both pyronaridine-artesunate and artemether-lumefantrine: 3 days.

| <b>Pyronaridine-Artesunate</b> |                                  |
|--------------------------------|----------------------------------|
| <b>Patient weight</b>          | <b>Number of sachets per day</b> |
| ≥5 to <8 kg                    | 1 (total course: 3 sachets)      |
| 8 to <15 kg                    | 2 (total course: 6 sachets)      |
| 15 to <20 kg                   | 3 (total course: 9 sachets)      |
| <b>Pyronaridine-Artesunate</b> |                                  |
| <b>Patient weight</b>          | <b>Number of tablets per day</b> |
| 20 to <24 kg                   | 1 (total course: 3 tablets)      |
| 24 to <45 kg                   | 2 (total course: 6 tablets)      |

| <b>Artemether-Lumefantrine</b> |                                                                                                                                                                                 |
|--------------------------------|---------------------------------------------------------------------------------------------------------------------------------------------------------------------------------|
| <b>Patient weight</b>          | <b>Number of tablets</b>                                                                                                                                                        |
| ≥5 to <15 kg                   | 1 tablet as single initial dose, followed by 1 tablet after 8 hours, and then 1 tablet twice a day (morning and evening) for the following 2 days (total course: 6 tablets)     |
| 15 to <25 kg                   | 2 tablets as single initial dose, followed by 2 tablets after 8 hours, and then 2 tablets twice a day (morning and evening) for the following 2 days (total course: 12 tablets) |
| 25 to <35 kg                   | 3 tablets as single initial dose, followed by 3 tablets after 8 hours, and then 3 tablets twice a day (morning and evening) for the following 2 days (total course: 18 tablets) |
| ≥35 kg                         | 4 tablets as single initial dose, followed by 4 tablets after 8 hours, and then 4 tablets twice a day (morning and evening) for the following 2 days (total course: 24 tablets) |
